# Supplementary material for: Solvometallurgical recovery of cobalt from lithium-ion battery cathode materials using deep-eutectic solvents
Source: Royal Society of Chemistry journal article supplement (doi:10.1039/d0gc00940g), 2020-01-01
Supplement: d0gc00940g1.pdf [file d0gc00940g1.pdf]

**Solvometallurgical recovery of cobalt from lithium-ion battery cathode material using  
deep-eutectic solvents**

Nand Peeters<sup>†</sup>, Koen Binnemans<sup>†</sup>, Sofía Riaño<sup>†\*</sup>

\*Corresponding author:

Email: [Sofia.Riano@kuleuven.be](mailto:Sofia.Riano@kuleuven.be)

*Electronic Supplementary Information (ESI)*

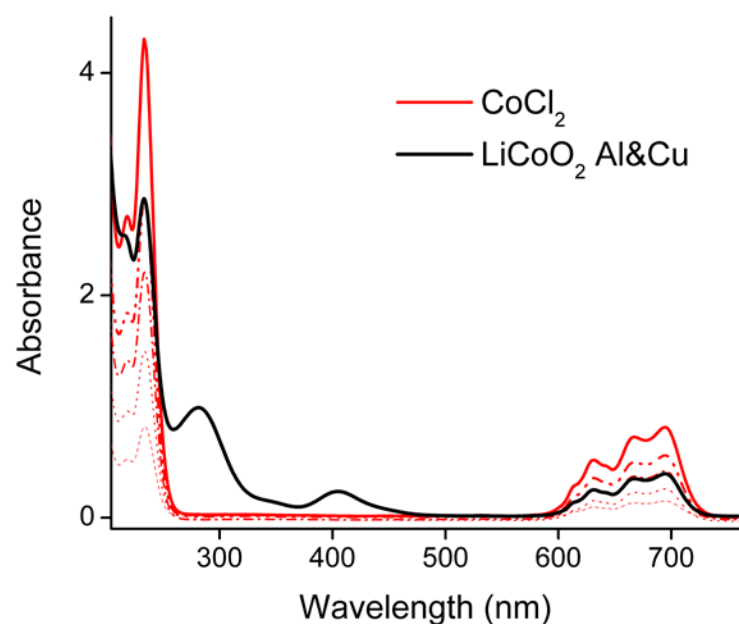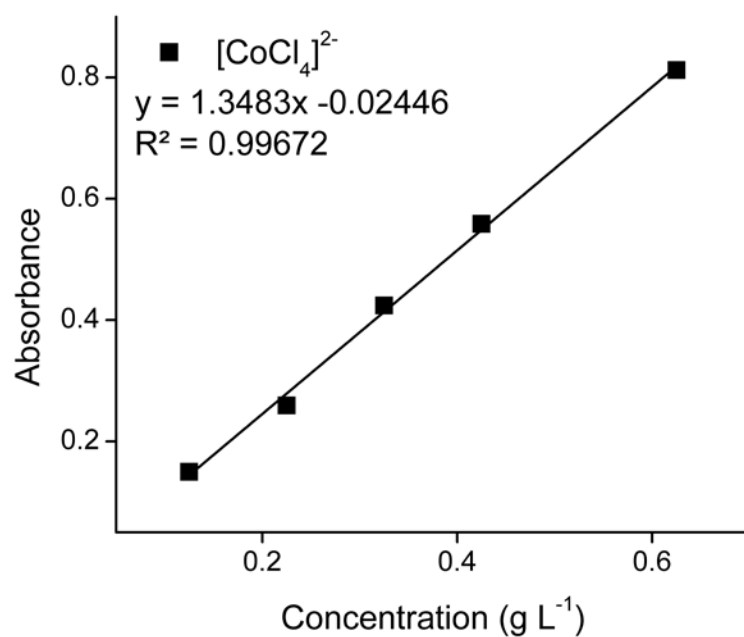

Figure S1: Quantification of the  $[\text{CoCl}_4]^{2-}$  complex in the pregnant leach solution (PLS) by UV-VIS spectroscopy. Top: spectra at different  $\text{CoCl}_2$  concentrations and in the PLS. Bottom: calibration curve constructed by use of the absorption band at 694 nm. The calibration curve was recorded by dissolving  $\text{CoCl}_2$  in 35 wt%  $\text{H}_2\text{O}$  diluted choline chloride solution (choline chloride concentration of ca.  $10 \text{ mol L}^{-1}$ ) at concentrations between  $0.125$  and  $0.625 \text{ g L}^{-1}$ . The PLS ( $\text{ChCl}:\text{CA} 2 : 1 + 35 \text{ wt\% H}_2\text{O}$  loaded with  $\text{Al(III)}$ ,  $\text{Co(II)}$ ,  $\text{Cu(II)}$  and  $\text{Li(I)}$ ) was diluted 40 times.

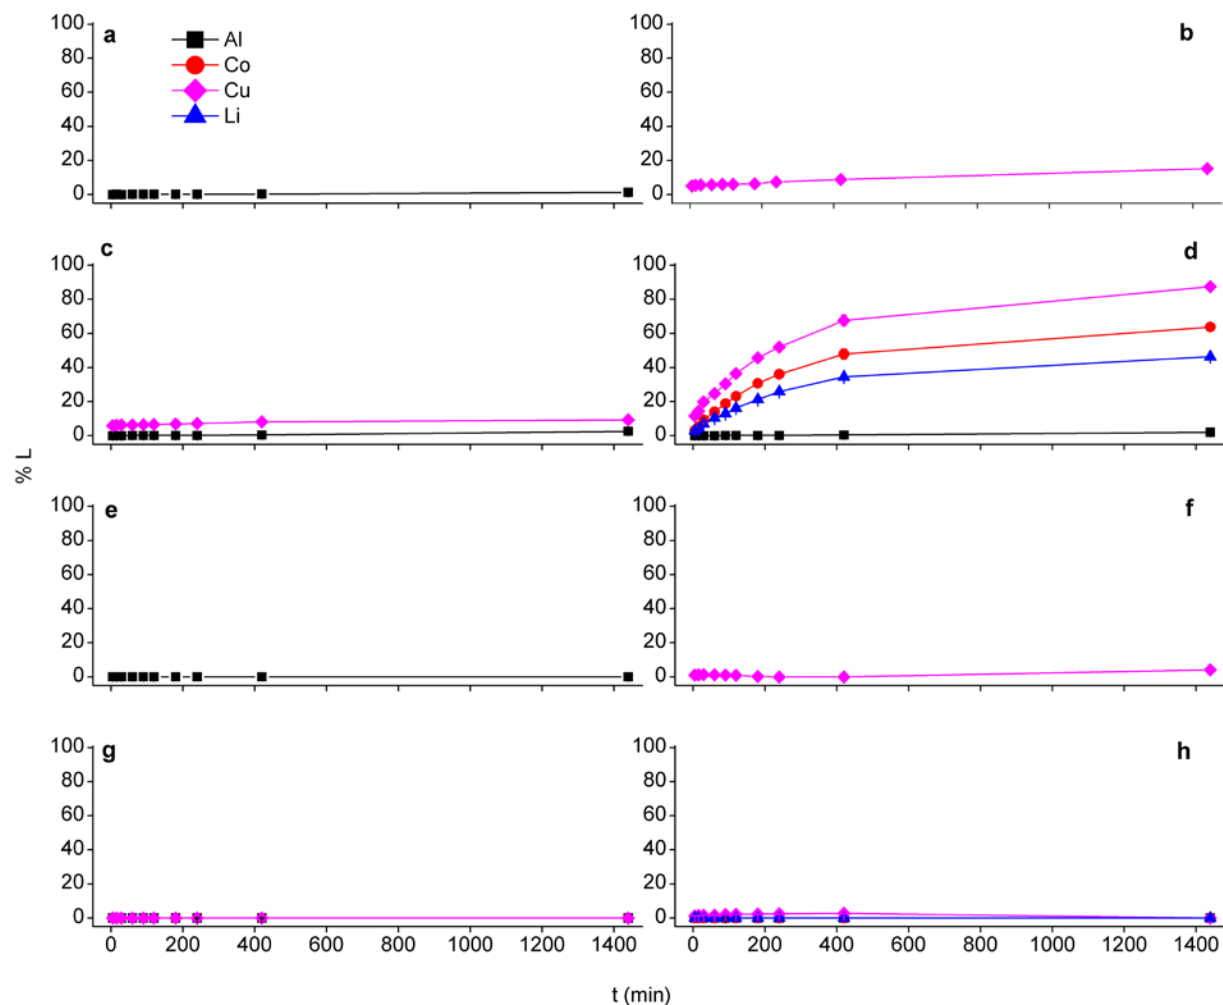

Figure S2: Comparison of leaching of  $\text{LiCoO}_2$  by citric acid and choline chloride, as a function of time. Leaching parameters:  $\text{S:L} = 20 \text{ g L}^{-1}$ ,  $40^\circ\text{C}$ ,  $\text{Al:LiCoO}_2 = 12 \text{ wt\%}$ ,  $\text{Cu:LiCoO}_2 = 24 \text{ wt\%}$  at a stirring speed of 900 rpm. Conditions: (a) Al leaching by  $2.8 \text{ mol L}^{-1}$  citric acid, (b) Cu leaching by  $2.8 \text{ mol L}^{-1}$  citric acid, (c) Al + Cu leaching by  $2.8 \text{ mol L}^{-1}$  citric acid (d)  $\text{LiCoO}_2$  with Al + Cu leaching by  $2.8 \text{ mol L}^{-1}$  citric acid (e). Al leaching by choline chloride 35 wt%  $\text{H}_2\text{O}$ , (f) Cu by choline chloride 35 wt%  $\text{H}_2\text{O}$ ; (g) Al + Cu leaching by choline chloride 35 wt%  $\text{H}_2\text{O}$ , (h)  $\text{LiCoO}_2$  with Al + Cu leaching by choline chloride 35 wt%  $\text{H}_2\text{O}$ . The citric acid concentration of  $2.8 \text{ mol L}^{-1}$  was selected because it represents the maximum solubility in water. The citric acid concentration in the DES is ca.  $3.6 \text{ mol L}^{-1}$ .

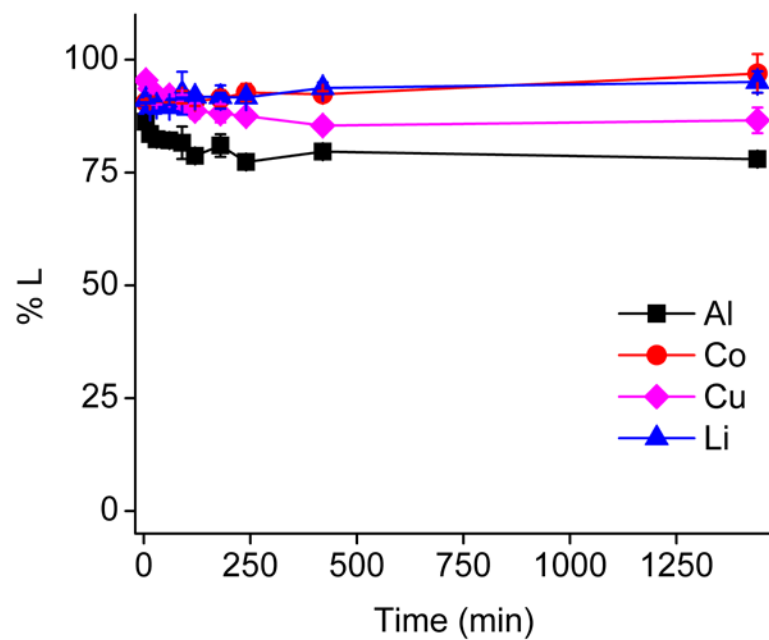

Figure S3: Leaching of  $\text{LiCoO}_2$  by  $3.6 \text{ mol L}^{-1}$  HCl solution, in the presence of Al and Cu metal. Leaching parameters: S:L = 20  $\text{g L}^{-1}$ ,  $40^\circ\text{C}$ , Al: $\text{LiCoO}_2$  = 12 wt%, Cu: $\text{LiCoO}_2$  = 24 wt% at a stirring rate of 900 rpm.

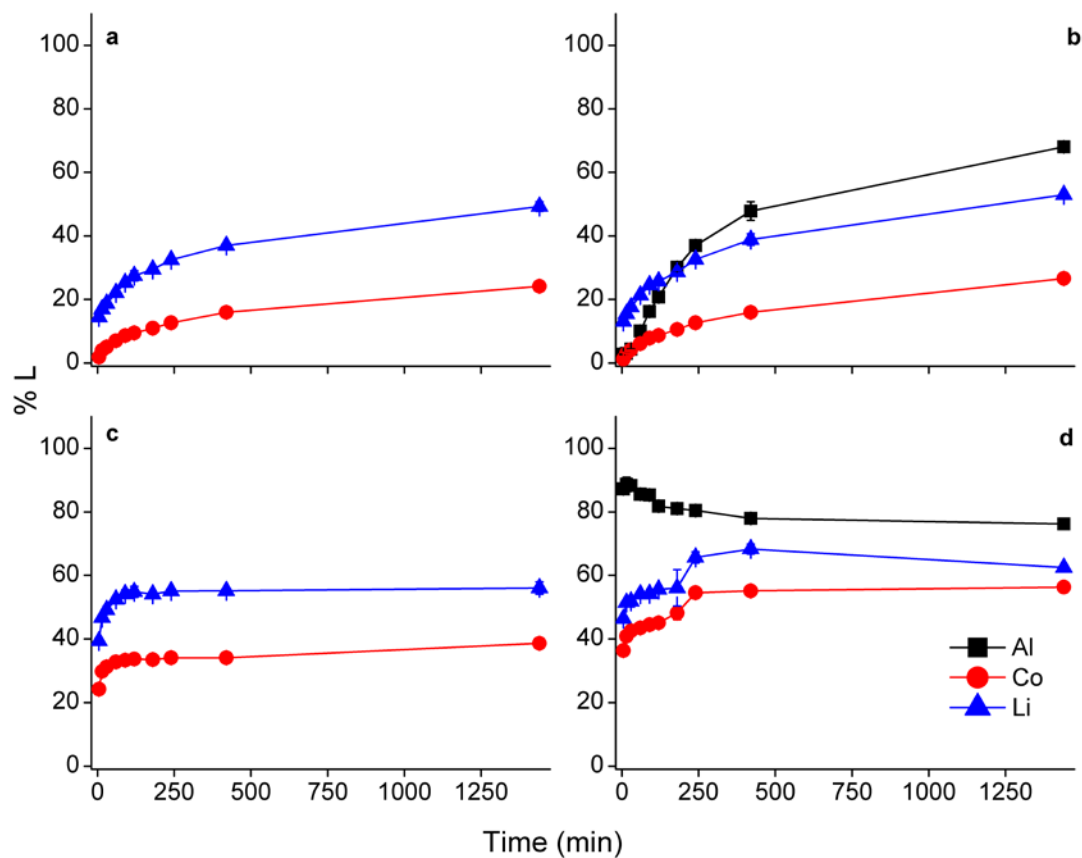

Figure S4: Comparison of leaching of LiCoO<sub>2</sub> by DES (top, a and b) and hydrochloric acid solution (bottom, c and d). Leaching parameters: S:L = 20 g L<sup>-1</sup>, 40 °C, Al:LiCoO<sub>2</sub> = 12 wt%, at a stirring rate of 900 rpm. Conditions: LiCoO<sub>2</sub> leaching by DES (a, right above), LiCoO<sub>2</sub> and Al leaching by DES (b, left above), LiCoO<sub>2</sub> leaching by HCl (c, right below), LiCoO<sub>2</sub> and Al leaching by HCl (d, left below). DES: (ChCl:CA (2 : 1 + 35 wt% H<sub>2</sub>O), concentration HCl = 1 mol L<sup>-1</sup>.

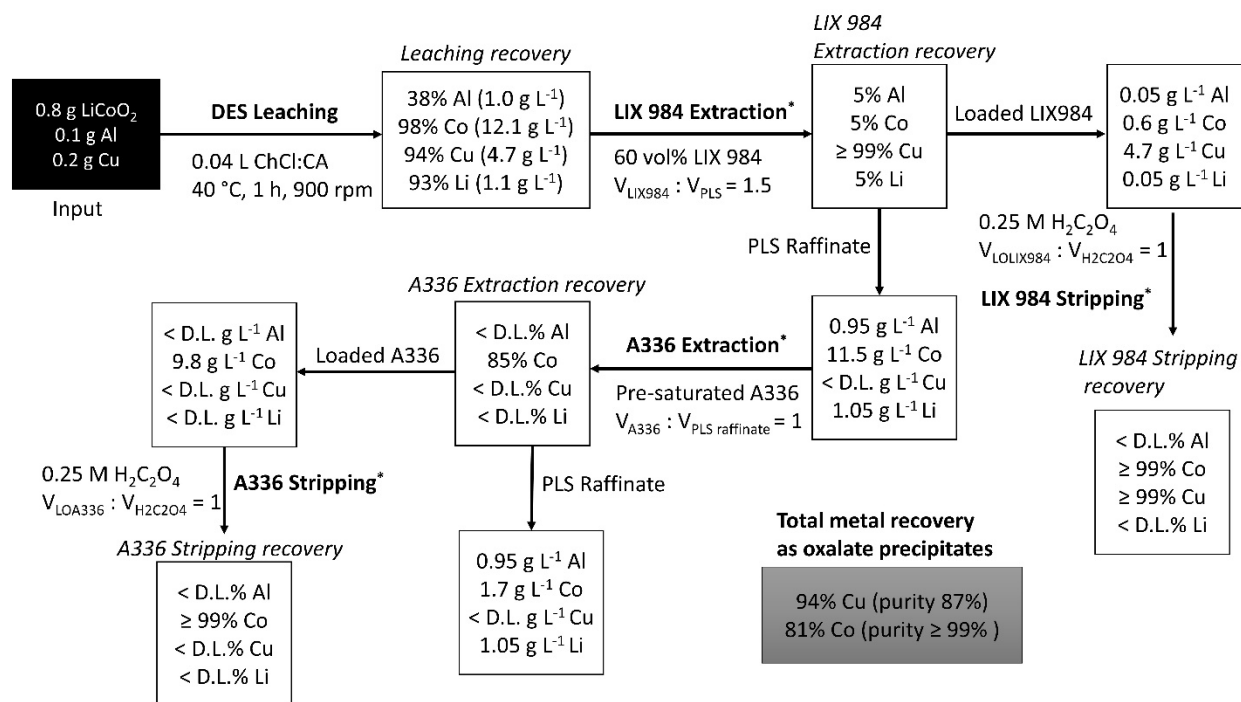

Figure S5: Overview of metal recovery during the entire process. \*All experiments were executed at RT, 2250 rpm for 0.5 h
